# Supplementary material for: Tailoring the structure, pH sensitivity and catalytic performance in Suzuki–Miyaura cross-couplings of Ln/Pd MOFs based on the 1,1′-di(p-carboxybenzyl)-2,2′-diimidazole linker
Source: Royal Society of Chemistry journal article supplement (doi:10.1039/c8dt01288a), 2018-01-01
Supplement: c8dt01288a1.pdf [file c8dt01288a1.pdf]

## Supporting Information

### **Tailoring the structure, pH sensitivity and catalytic performance in Suzuki-Miyaura cross-couplings of Ln/Pd MOFs based on the 1,1'-di(*p*-carboxybenzyl)-2,2'-diimidazole linker**

Li-Xin You,<sup>a</sup> Lan-Xin Cui,<sup>a</sup> Bai-Bei Zhao,<sup>a</sup> Gang Xiong,<sup>a</sup> Fu Ding,<sup>a</sup> Bao-Yi Ren,<sup>a</sup> Zhong-Liang Shi,<sup>a</sup> Ileana Dragutan,<sup>b</sup> Valerian Dragutan,<sup>\*b</sup> and Ya-Guang Sun<sup>\*a</sup>

<sup>a</sup> *Key Laboratory of Inorganic Molecule-Based Chemistry of Liaoning Province, Shenyang University of Chemical Technology, Shenyang, PR China*

<sup>b</sup> *Institute of Organic Chemistry, Romanian Academy, Bucharest, Romania*

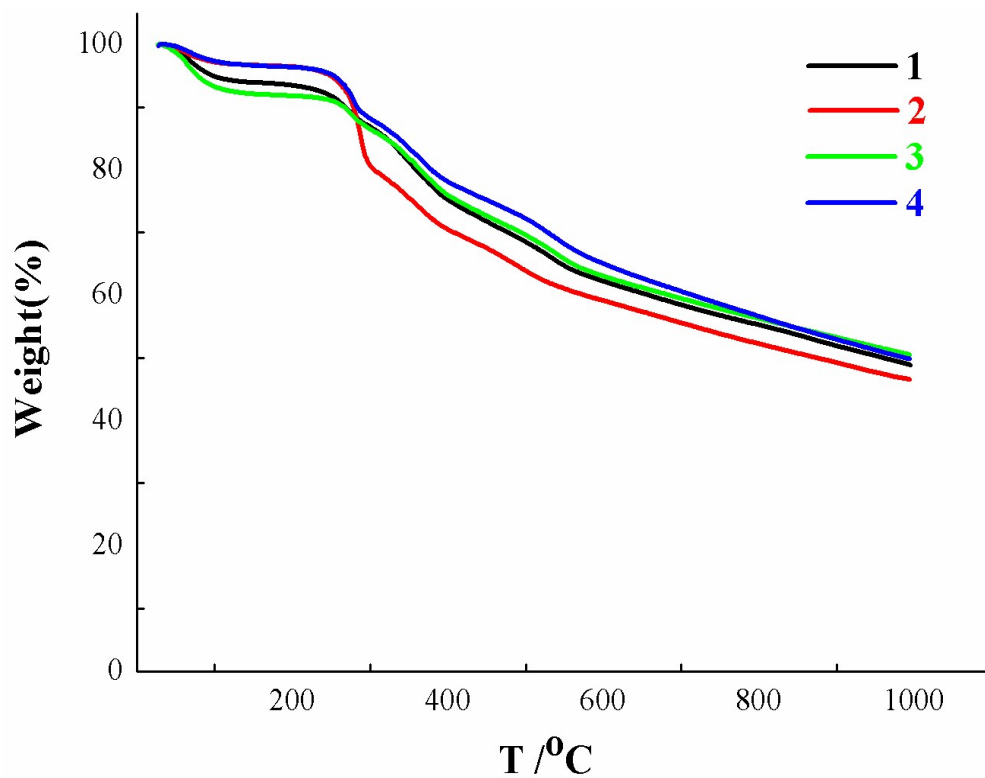

Fig. S1 TGA plots for different samples

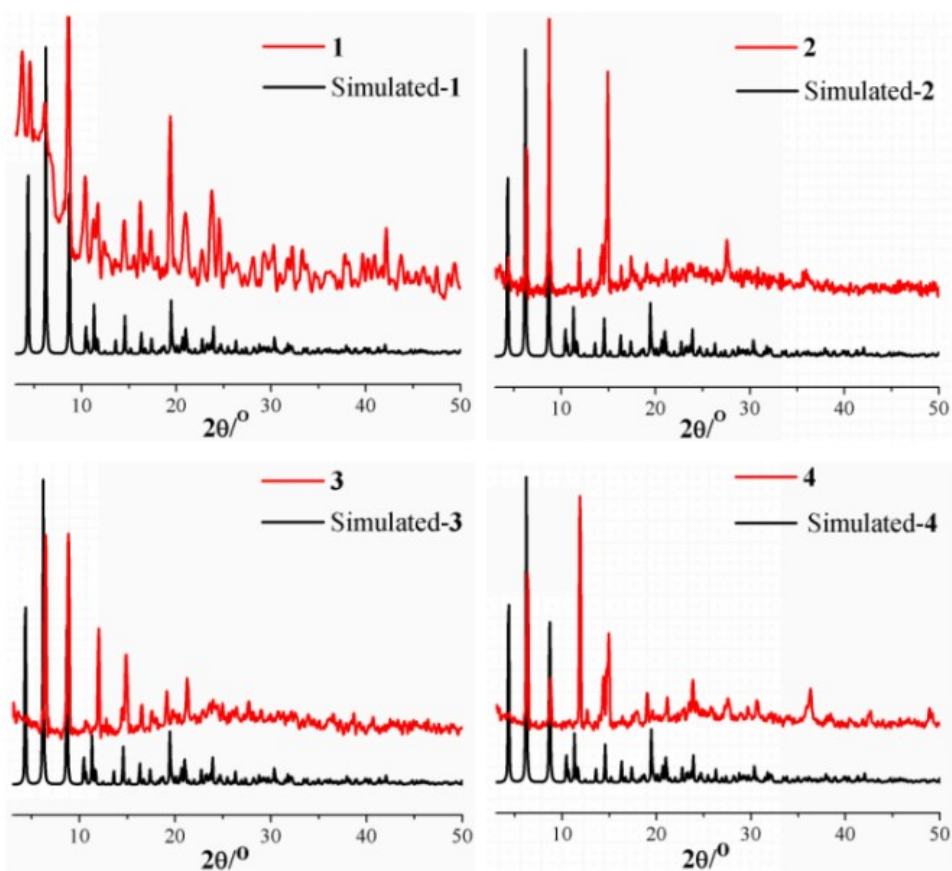

Fig. S2 X-ray powder diffraction patterns of 1-4

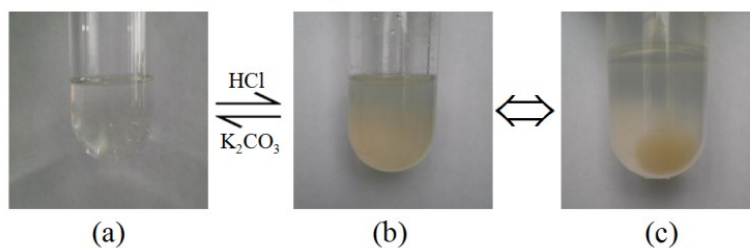

**Fig. S3** (a) Complex **1** (0.4% mmol),  $K_2CO_3$  (2.0 mmol) in  $H_2O$  (6.0 mL); (b) acidified with diluted  $HCl$  ( $2.0 \text{ mol L}^{-1}$ ) to  $pH = 4$ ; (c) the mixture (b) after centrifugation.

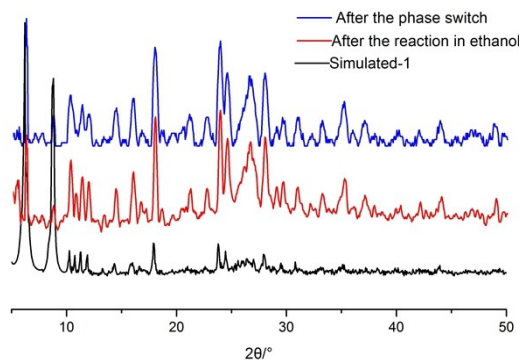

**Fig. S4** X-ray powder diffraction patterns of **1**. Simulated (black); recovered after reaction in ethanol (red); precipitate [Fig. S3(c)] recovered from water after phase switch with acid (blue).

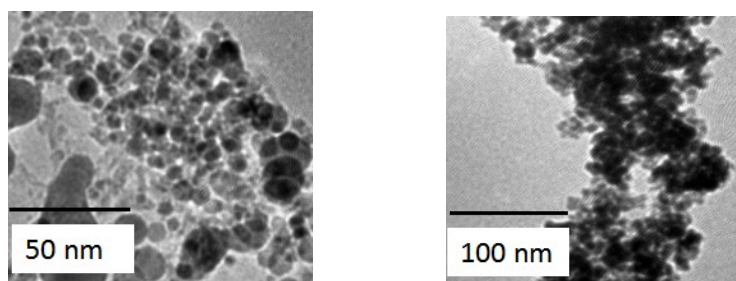

**Fig. S5** TEM images of catalyst **1** after the reaction in water-ethanol (left) and water (right).

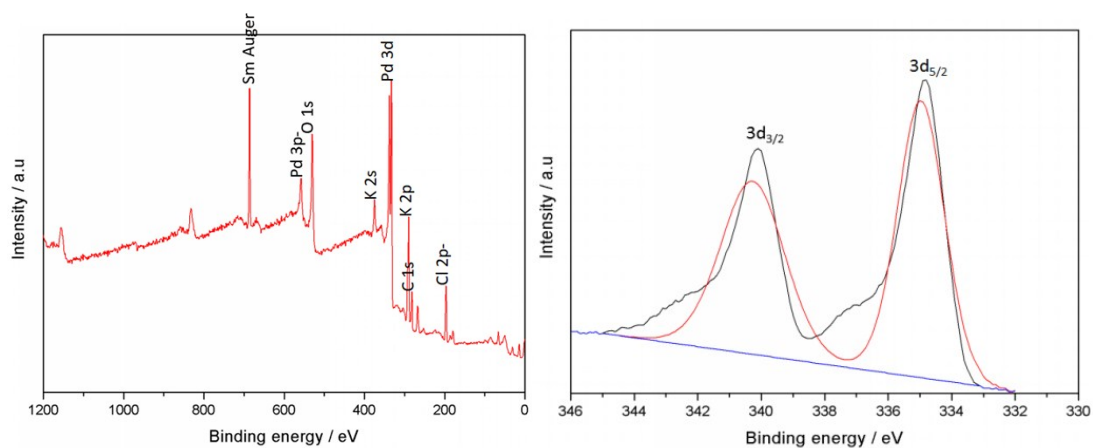

**Fig. S6** XPS spectra of catalyst **1** after the reaction in water

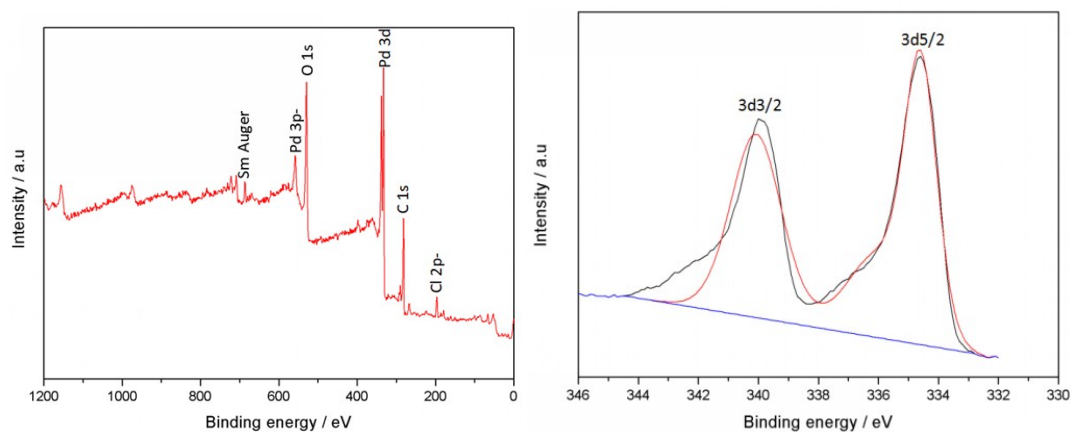

**Fig. S7** XPS spectra of catalyst **1** after the reaction in water-ethanol

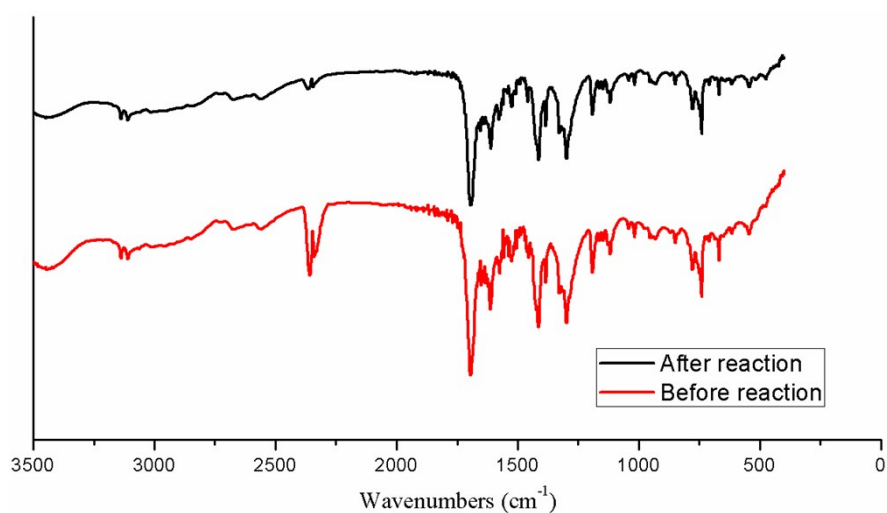

**Fig. S8** IR spectra of **1**, before and after the cross-coupling reaction in ethanol

### GC-yield Standard Curve

The response peak area ratios of the product and internal standard, n-hexadecane ( $A_p/A_d$ ) were obtained from Agilent 7890A GC spectrometer. All the GC-yields were calculated by the formula of curve fitting.

### GC-Yield Standard Curve of biphenyl

|           |        |        |        |        |        |        |
|-----------|--------|--------|--------|--------|--------|--------|
| $A_p/A_d$ | 0.0806 | 0.2106 | 0.4497 | 0.6333 | 0.6953 | 0.7448 |
| Yields    | 0.1    | 0.30   | 0.60   | 0.81   | 0.90   | 1.00   |

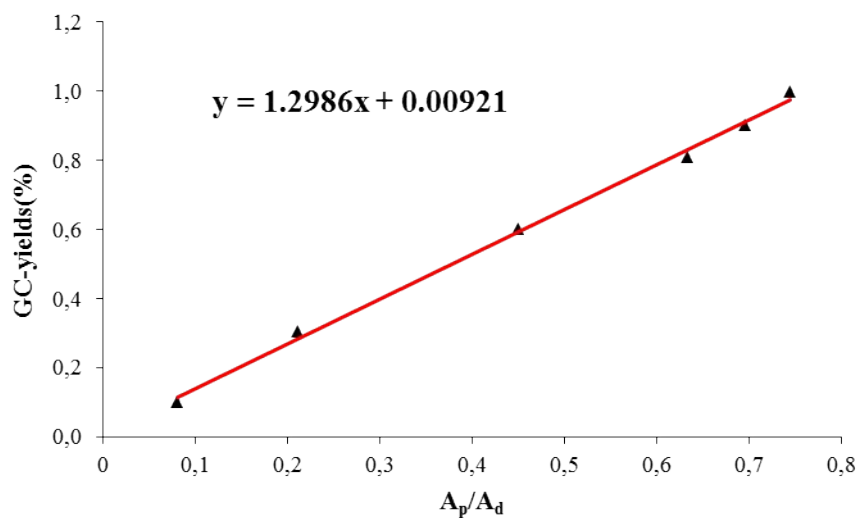

**GC-Yield Standard Curve of 4-Phenyltoluene**

|           |        |        |        |        |        |        |
|-----------|--------|--------|--------|--------|--------|--------|
| $A_p/A_d$ | 0.0833 | 0.2243 | 0.4362 | 0.6207 | 0.7095 | 0.7776 |
| Yields    | 0.1    | 0.30   | 0.60   | 0.80   | 0.90   | 1.00   |

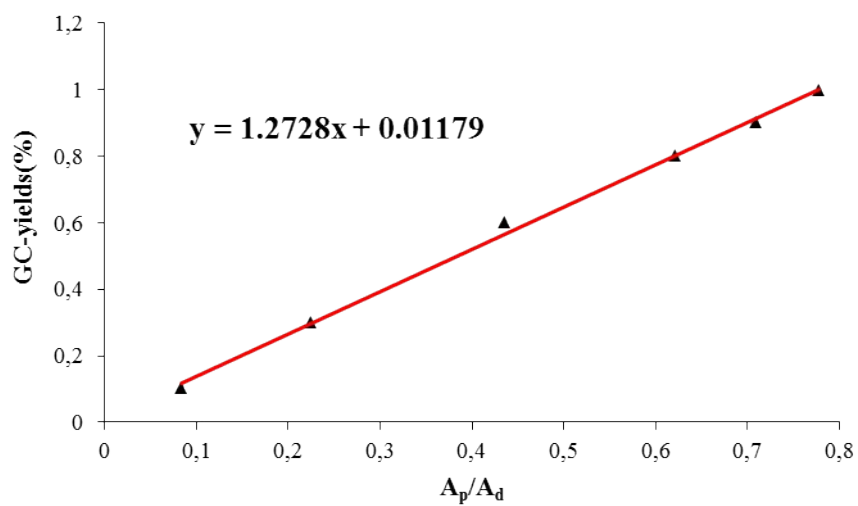

**GC-Yield Standard Curve of 4-Phenylacetophenone**

|           |        |        |        |        |        |        |
|-----------|--------|--------|--------|--------|--------|--------|
| $A_p/A_d$ | 0.0730 | 0.2305 | 0.4982 | 0.6735 | 0.7293 | 0.8697 |
|-----------|--------|--------|--------|--------|--------|--------|

|        |     |      |      |      |      |      |
|--------|-----|------|------|------|------|------|
| Yields | 0.1 | 0.30 | 0.60 | 0.80 | 0.90 | 1.00 |
|--------|-----|------|------|------|------|------|

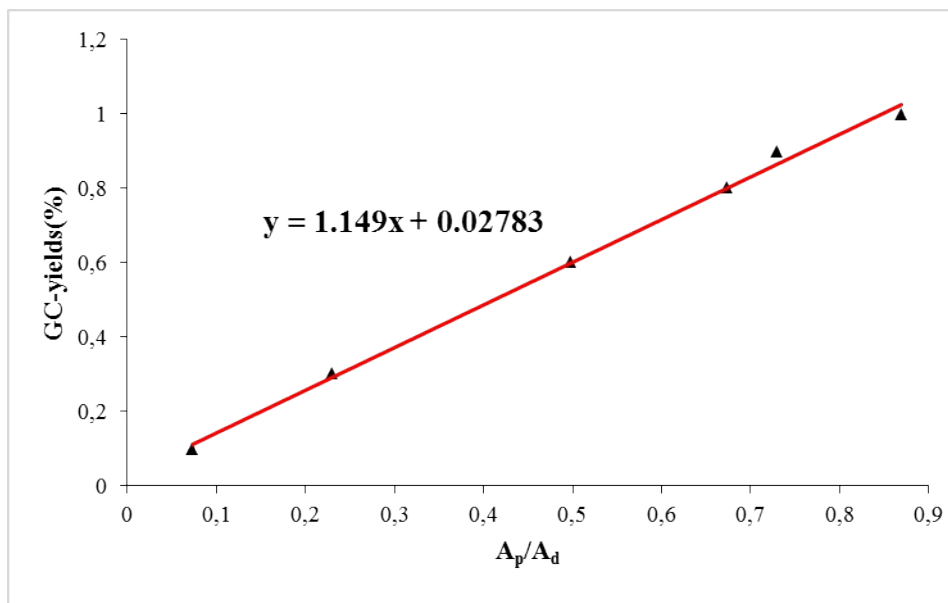

### <sup>1</sup>H NMR Spectra of products

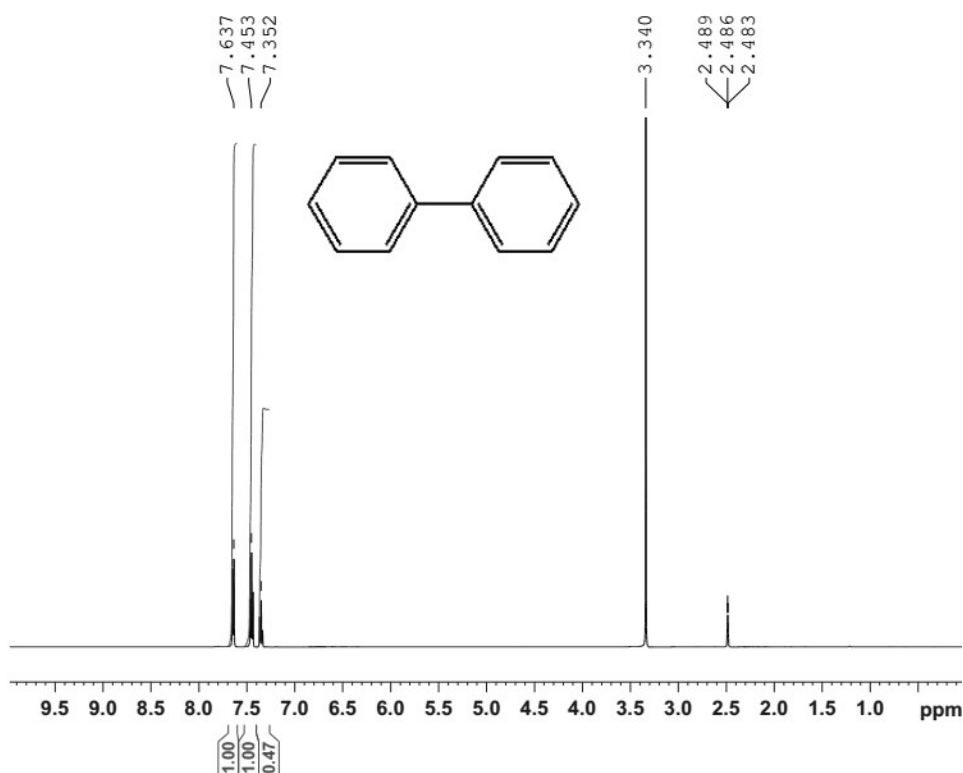

**Biphenyl:** <sup>1</sup>H NMR (500 MHz, DMSO-*d*<sub>6</sub>):  $\delta = 7.35$  (*t*, 2H), 7.45(*t*, 4H), 7.64 (*d*, 4H).

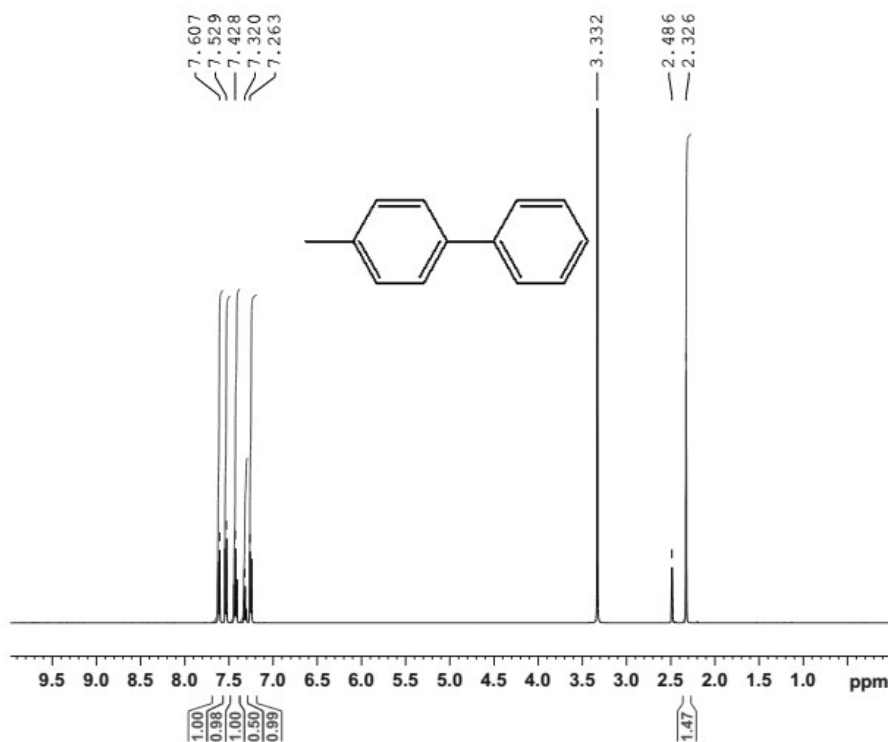

**4-Methyl-1,1'-biphenyl:**  $^1\text{H}$  NMR (500 MHz,  $\text{DMSO-}d_6$ ):  $\delta = 2.33$  (s, 3H), 7.26 (d, 2H), 7.32 (t, 1H), 7.43 (t, 2H), 7.53 (d, 2H), 7.61 (d, 2H).

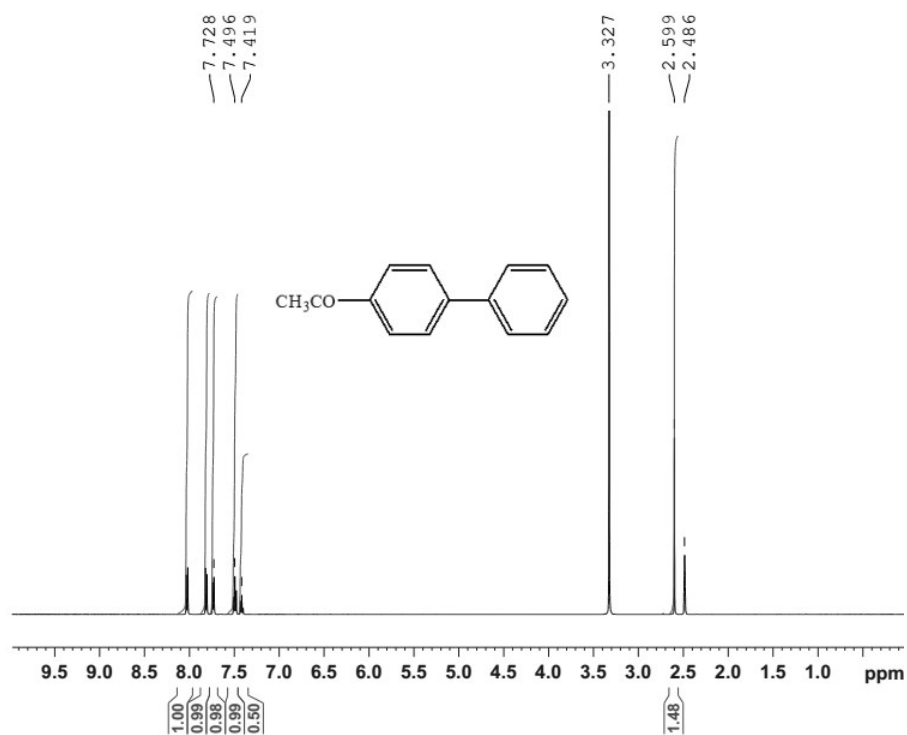

**4-Acetyl-1,1'-biphenyl:**  $^1\text{H}$  NMR (500 MHz,  $\text{DMSO-}d_6$ ):  $\delta = 2.60$  (s, 3H), 7.42 (t, 2H), 7.50 (t, 2H), 7.73 (d, 2H), 7.82 (d, 2H), 8.03 (d, 2H)
